# Supplementary material
Source: PubMed Central journal article supplement (PMC8889450)
Supplement: NIHMS1780387-supplement-supplemental_material.pdf [file NIHMS1780387-supplement-supplemental_material.pdf]

Supplemental material

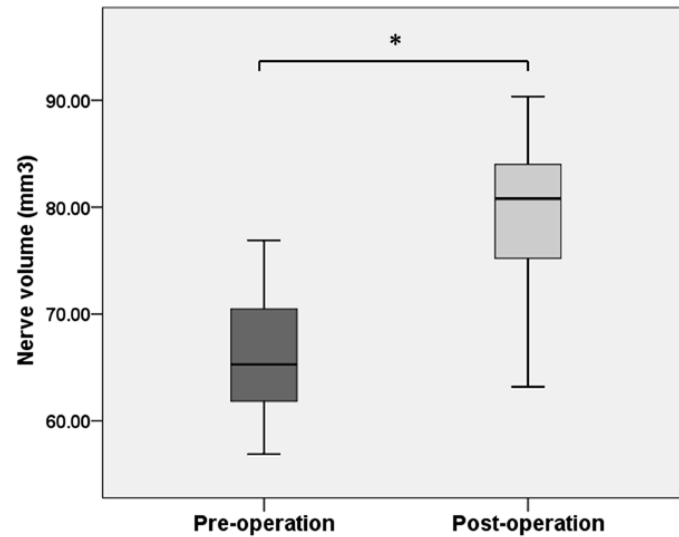

The figure displayed ipsilateral TGN volume comparison between pre- and post-operation (1 year after MVD surgery) in 15 primary TN patients. The volume of ipsilateral TGN increased statistically after operation compared to that at the time point of pre-operation in the patient group.

\*: Mann-Whitney U test,  $p < 0.01$
